# Supplementary material
Source: publisher figshare collection journal article supplement (https://acs.figshare.com/ndownloader/files/14700983)
Supplement: Supplementary file 1 [file 14700983]

## SUPPORTING INFORMATION

### **Synthesis of a 3,4-Disubstituted 1,8-Naphthalimide Based DNA Intercalator for Direct Imaging of *Legionella pneumophila***

Hemant Sharma,<sup>a,‡</sup> Jagpreet Singh Sidhu,<sup>b,‡</sup> Walid M. Hassen,<sup>a</sup> Narinder Singh,<sup>\*,b</sup> and Jan J. Dubowski<sup>\*,a</sup>

<sup>a</sup>Laboratory for Quantum Semiconductors and Photon-Based BioNanotechnology, Interdisciplinary Institute for Technological Innovation (3IT), CNRS UMI-3463, Department of Electrical and Computer Engineering, Université de Sherbrooke, Sherbrooke, Québec J1K 2R1, Canada.

<sup>b</sup>Department of Chemistry, Indian Institute of Technology Ropar, Rupnagar, Punjab 140001, India.

‡ contributed equally

hemant.sharma@usherbrooke.ca; jagpreet.singh@iitrpr.ac.in;

mohamed.walid.hassen@usherbrooke.ca; nsingh@iitrpr.ac.in; jan.j.dubowski@usherbrooke.ca

<sup>1</sup>H NMR of S-12

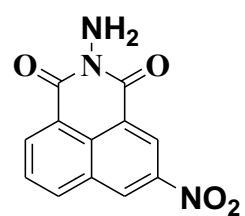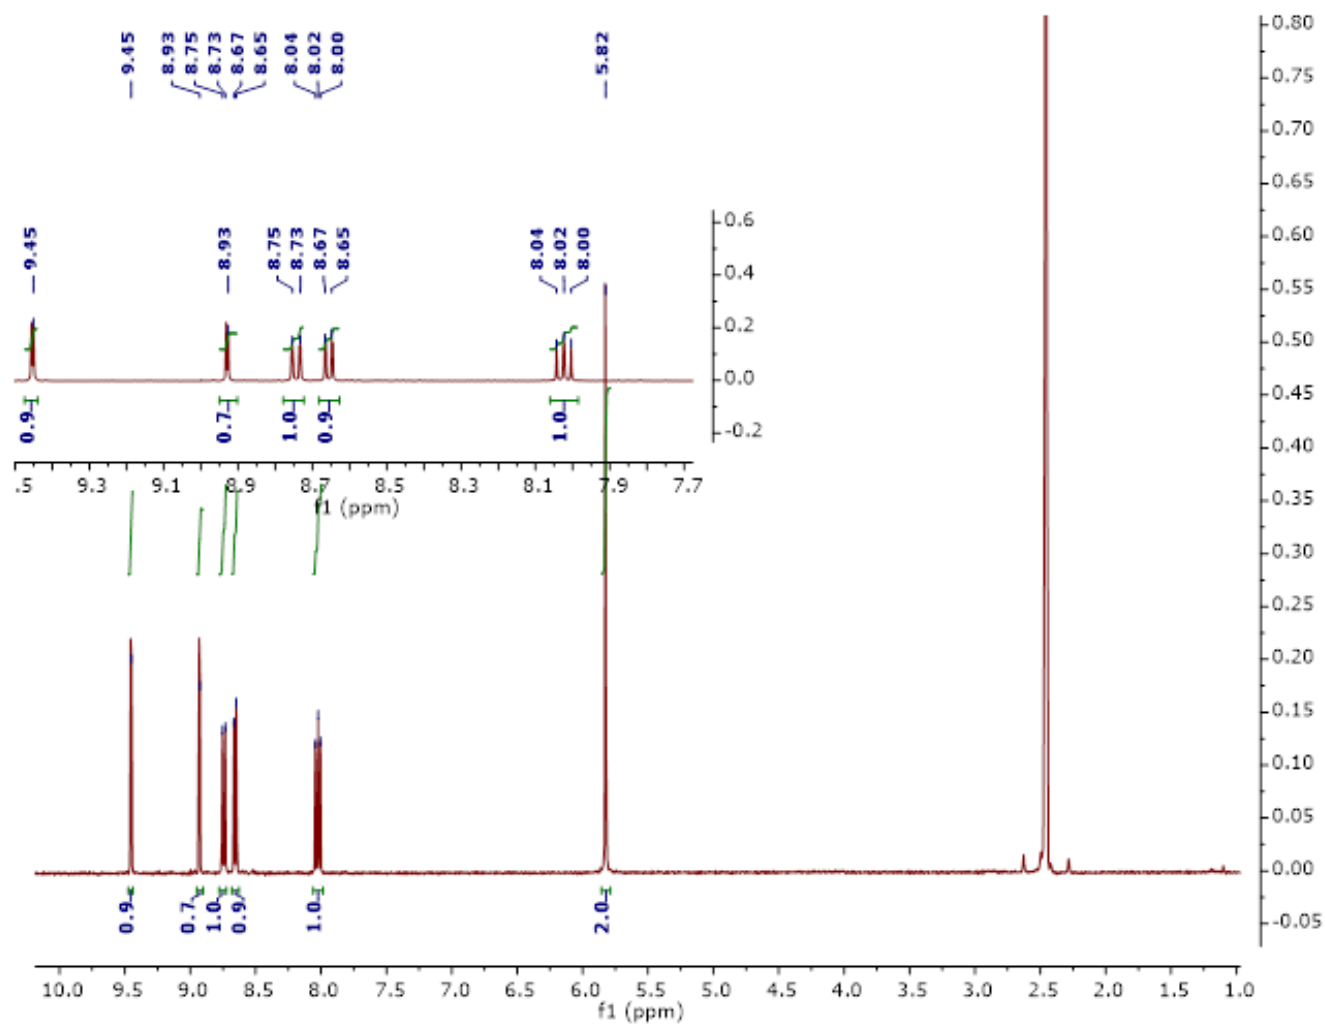

**Figure S1.** <sup>1</sup>H NMR spectra of S-12 in DMSO-*d*<sub>6</sub>

**$^{13}\text{C}$  NMR of S-12**

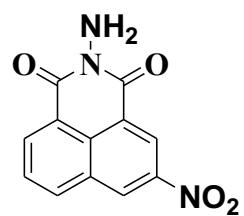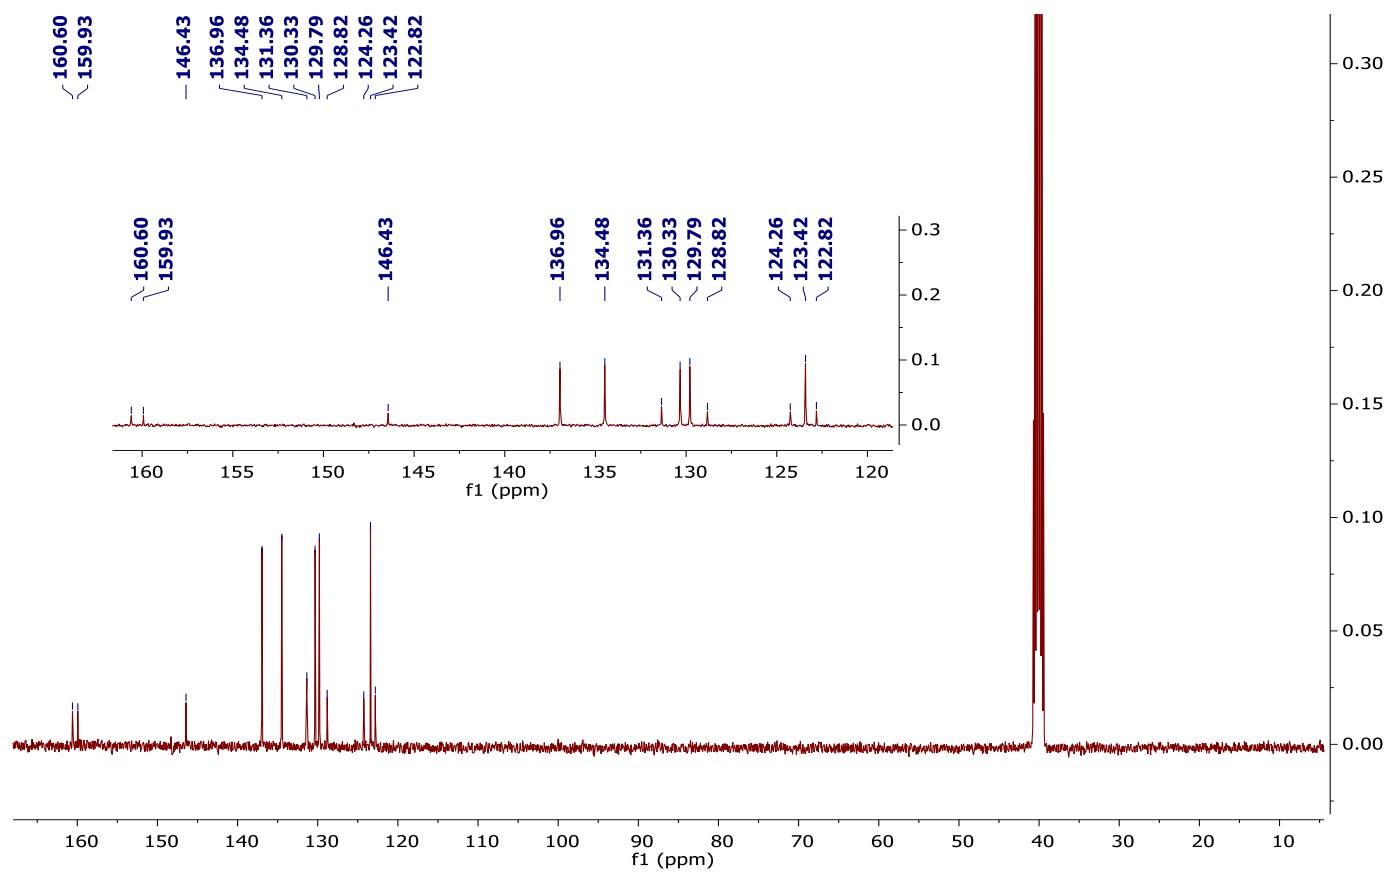

**Figure S2.**  $^{13}\text{C}$  NMR spectra of S-12 in  $\text{DMSO}-d_6$

Sample Name : S-12  
 Test Name : HRMS-1  
 280119-S-12- 11 (0.122) AM (Top,4, Ar,10000.0,0.00,0.00); Cm (6:17)

I.I.T.ROPAR

XEVO G2-XS QTOF

1: TOF MS ES+  
 1.56e+007

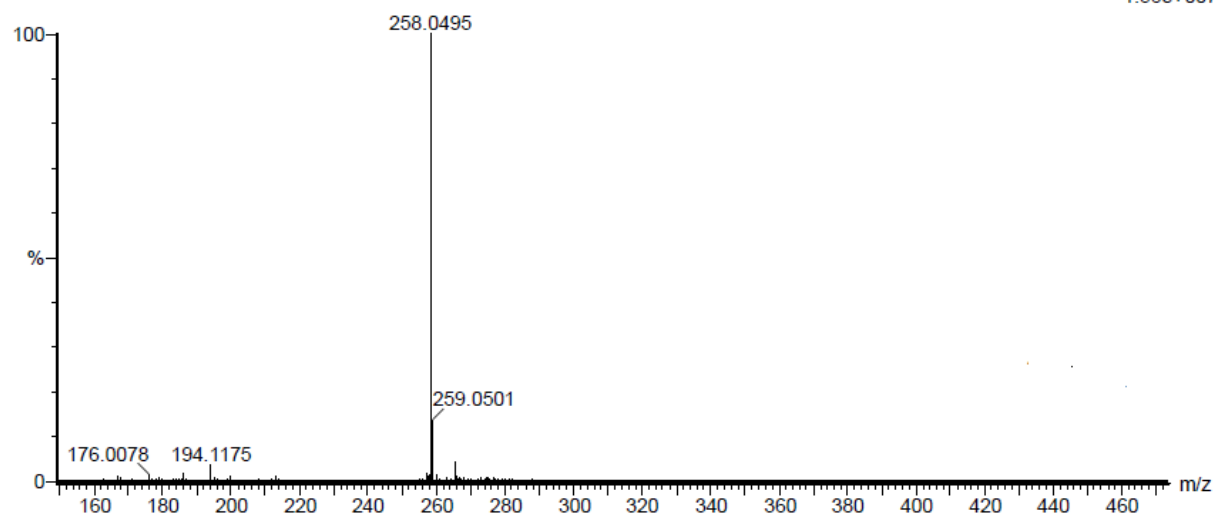

Minimum: -1.5  
 Maximum: 5.0 10.0 50.0

| Mass     | Calc. Mass | mDa  | PPM  | DBE  | i-FIT | Norm | Conf(%) | Formula      |
|----------|------------|------|------|------|-------|------|---------|--------------|
| 258.0495 | 258.0515   | -2.0 | -7.8 | 10.5 | 859.2 | n/a  | n/a     | C12 H8 N3 O4 |

**Figure S3.** Mass spectra of **S-12**.

**$^1\text{H}$  NMR of S-13**

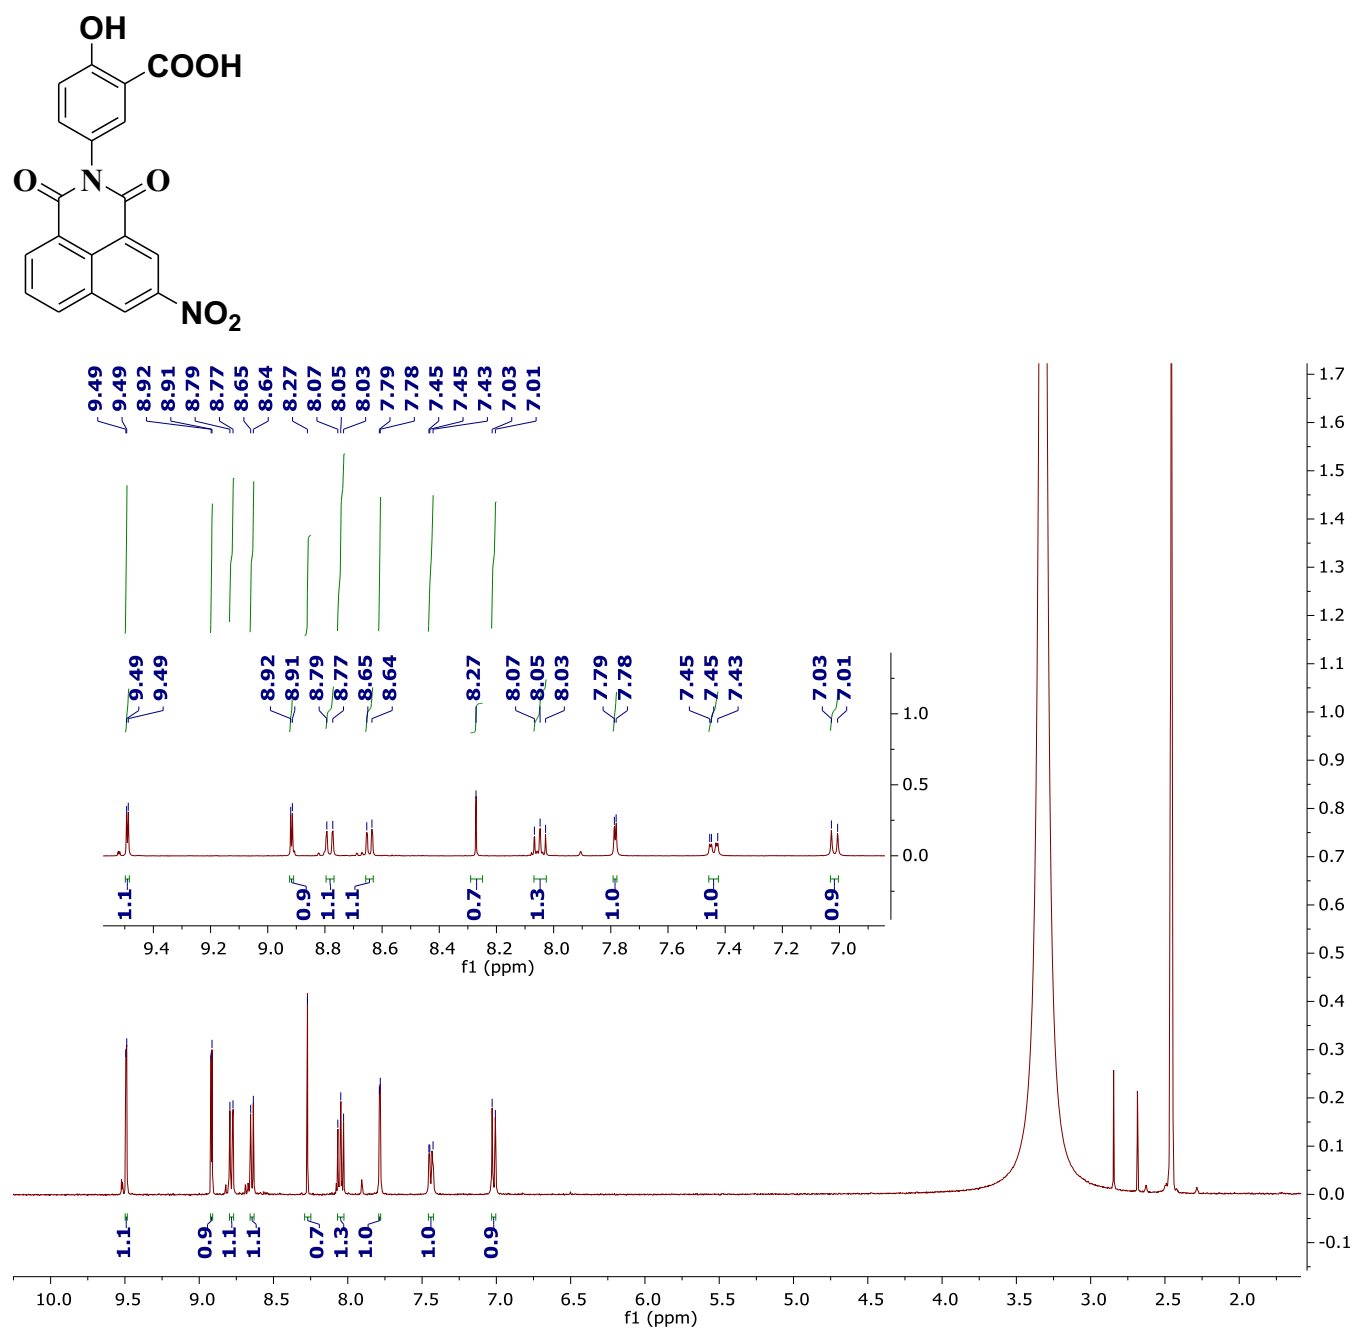

**Figure S4.**  $^1\text{H}$  NMR spectra of S-13 in  $\text{DMSO}-d_6$ .

**$^{13}\text{C}$  NMR of S-13**

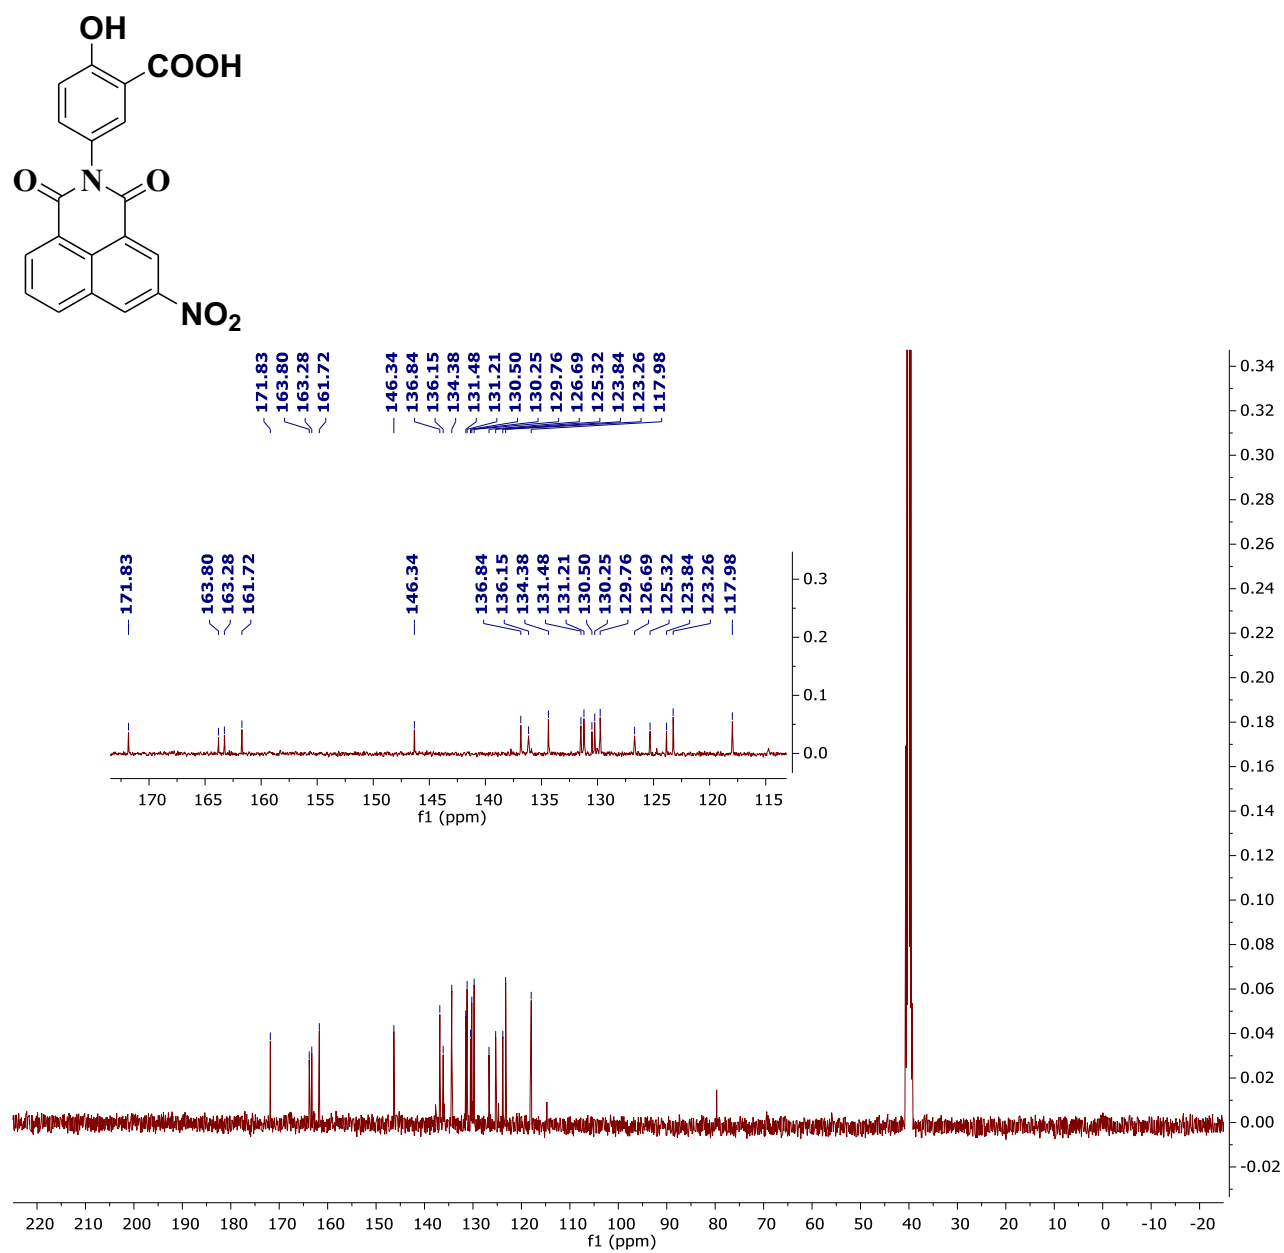

**Figure S5.**  $^{13}\text{C}$  NMR spectra of S-13 in DMSO- $d_6$ .

Sample Name : S-13 I.I.T.ROPAR XEVO G2-XS QTOF  
 Test Name : HRMS-1  
 280119-S-13- 11 (0.123) AM2 (Ar,19000.0,0.00,0.00); Cm (7:18) 1: TOF MS ES+  
 5.16e+006

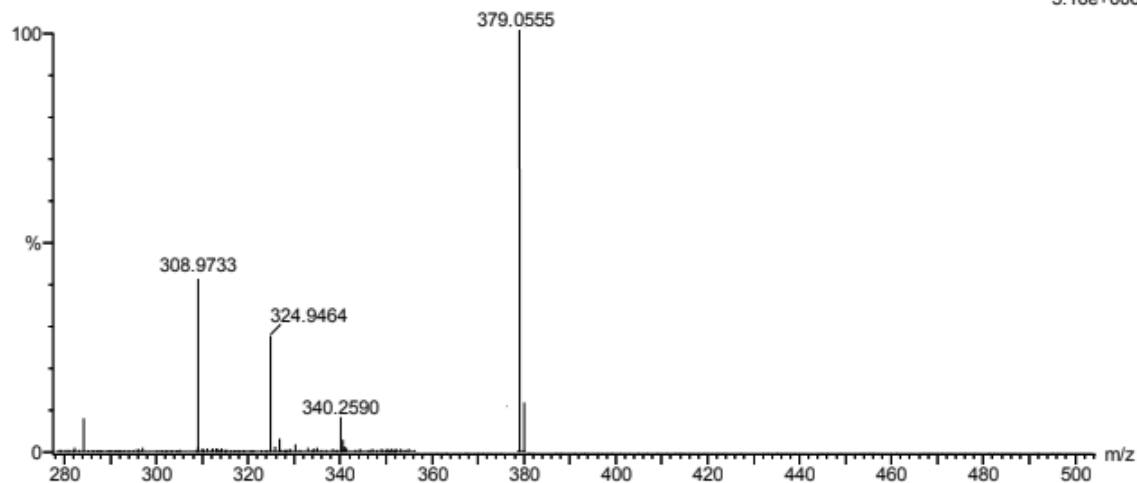

Minimum: -1.5  
 Maximum: 5.0 5.0 50.0

| Mass     | Calc. Mass | mDa  | PPM  | DBE  | i-FIT | Norm | Conf(%) | Formula       |
|----------|------------|------|------|------|-------|------|---------|---------------|
| 379.0555 | 379.0566   | -1.1 | -2.9 | 15.5 | 598.1 | n/a  | n/a     | C19 H11 N2 O7 |

**Figure S6.** Mass spectra of **S-13**.

**<sup>1</sup>H NMR of S-21**

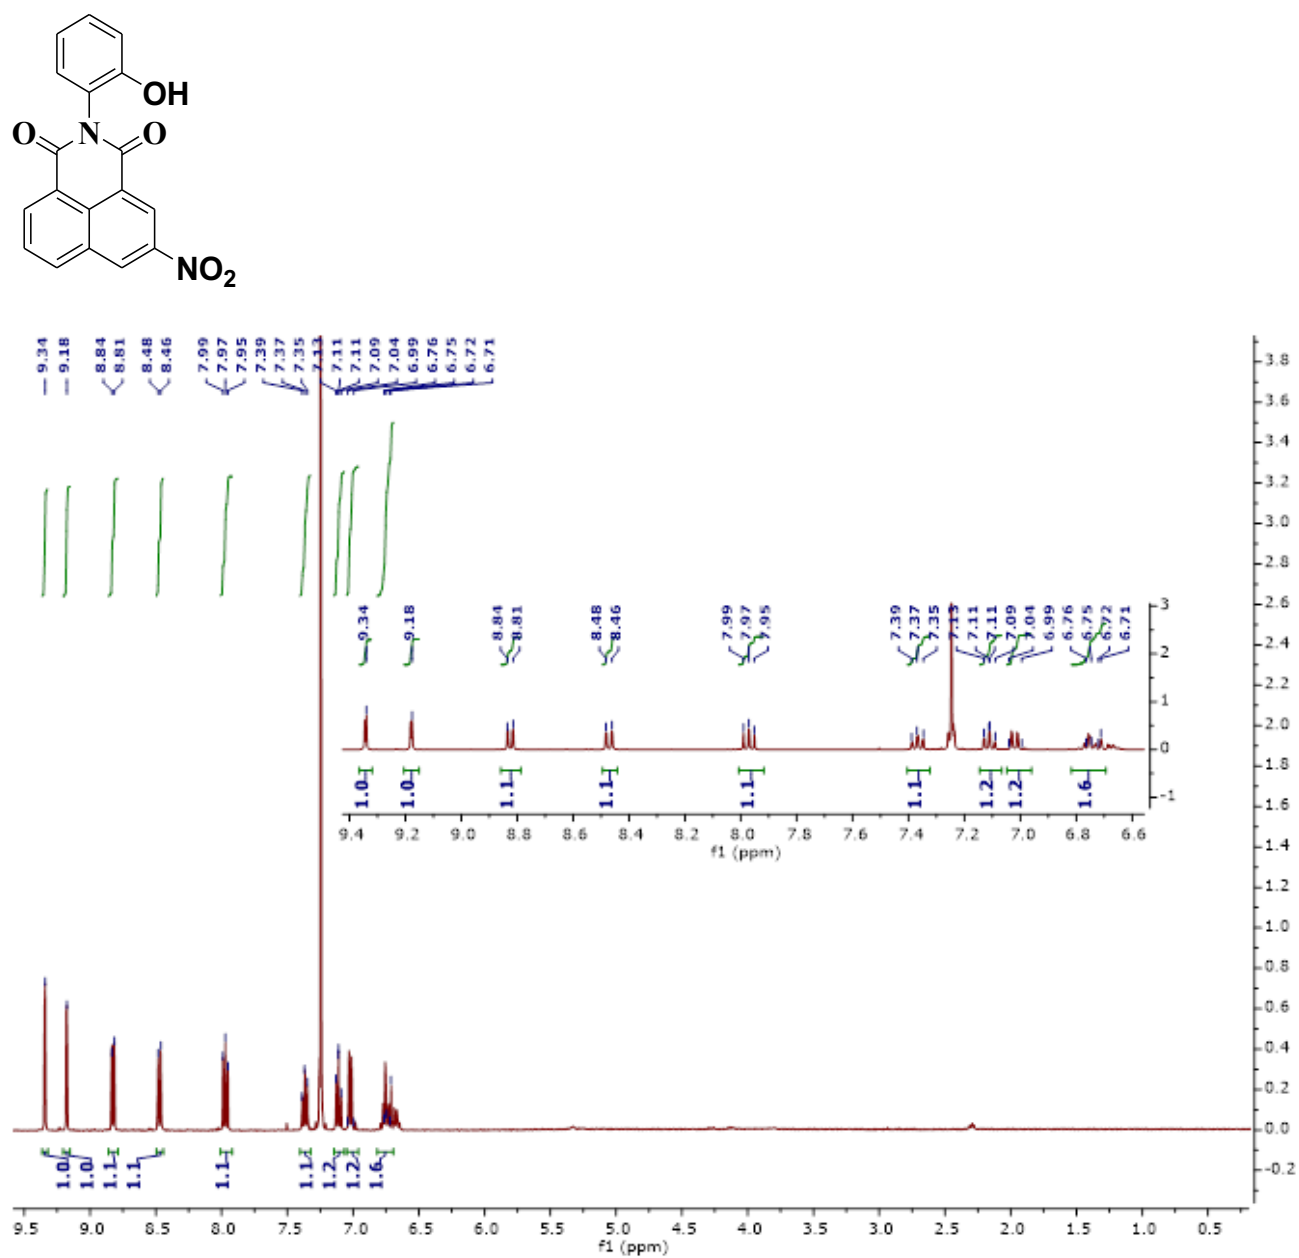

**Figure S7.** <sup>1</sup>H NMR spectra of S-21 in CDCl<sub>3</sub>.



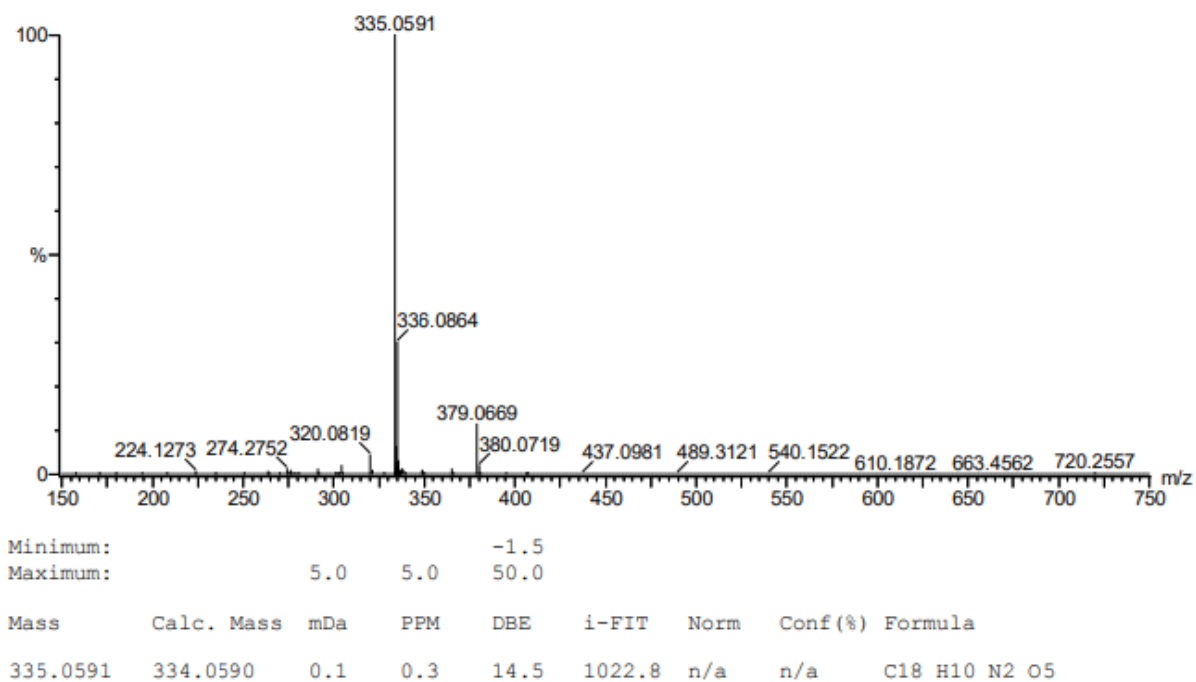

**Figure S8.** Mass spectra of S-21.

**<sup>1</sup>H NMR of 3**

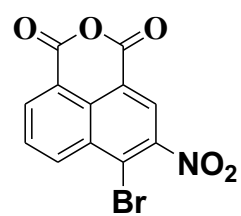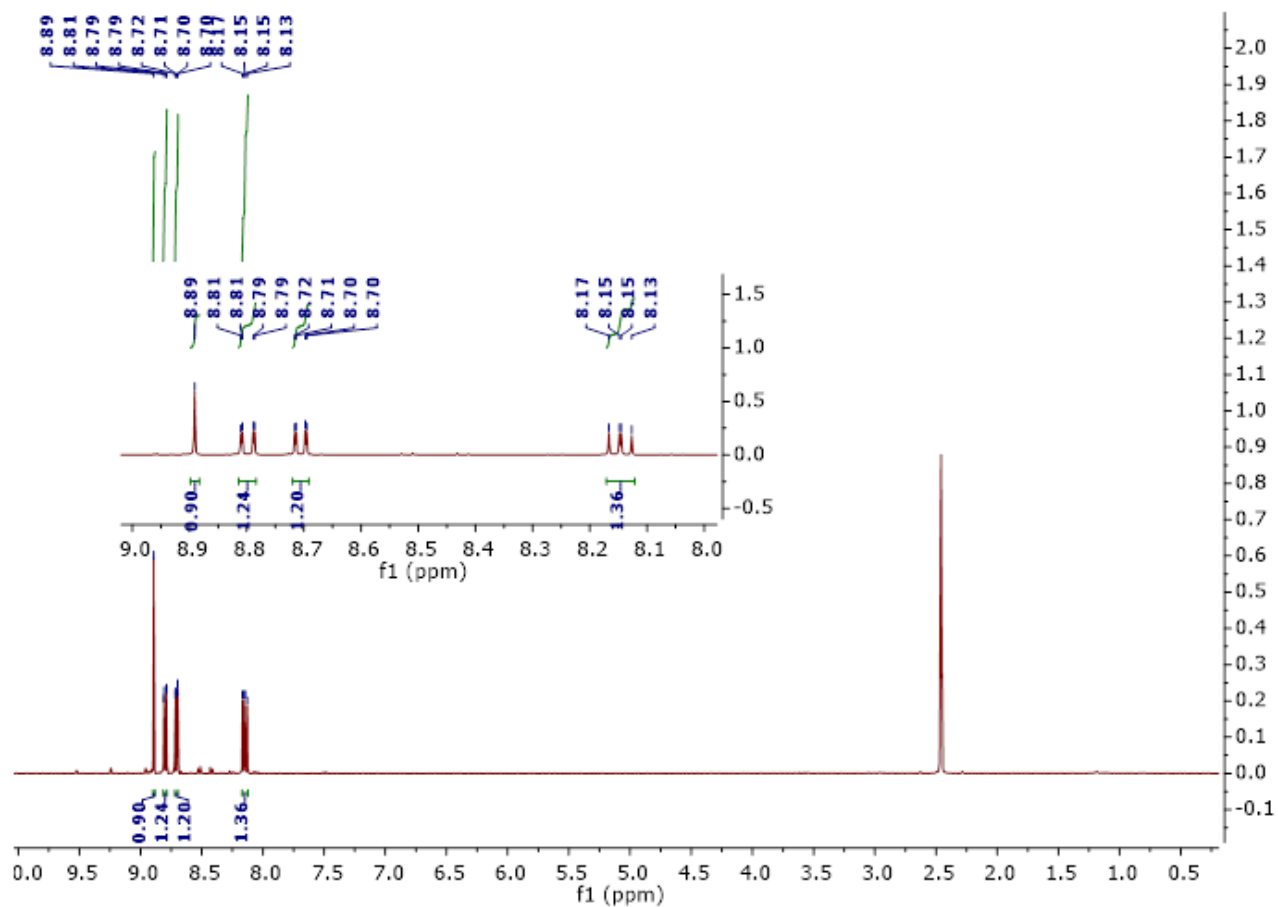

**Figure S9.** <sup>1</sup>H NMR spectra of **3** in DMSO-*d*<sub>6</sub>.

**$^1\text{H}$  NMR of S-15**

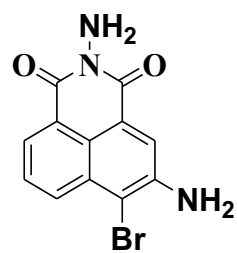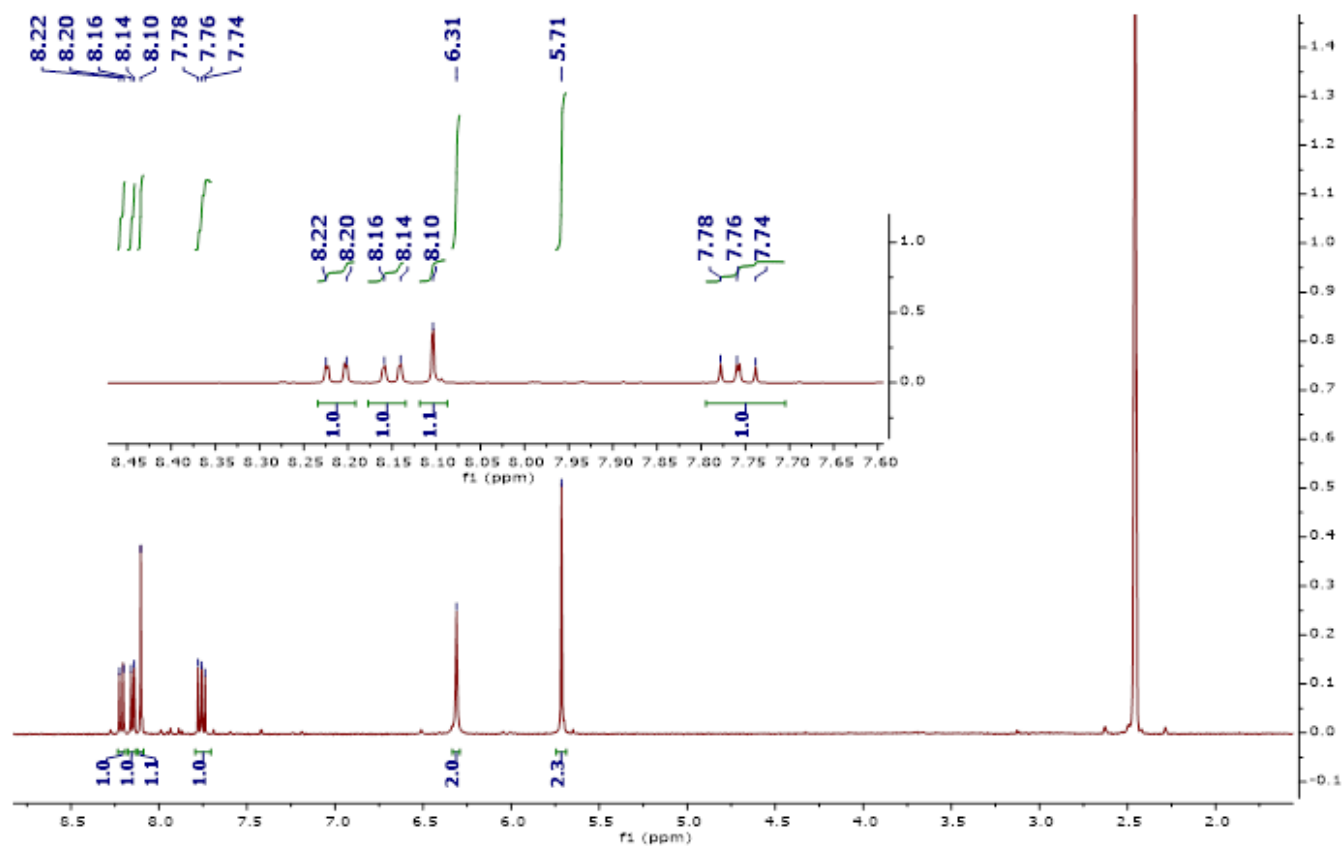

**Figure S10.**  $^1\text{H}$  NMR spectra of S-15 in  $\text{DMSO}-d_6$ .

**$^{13}\text{C}$  NMR of S-15**

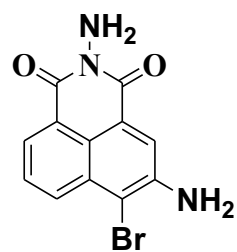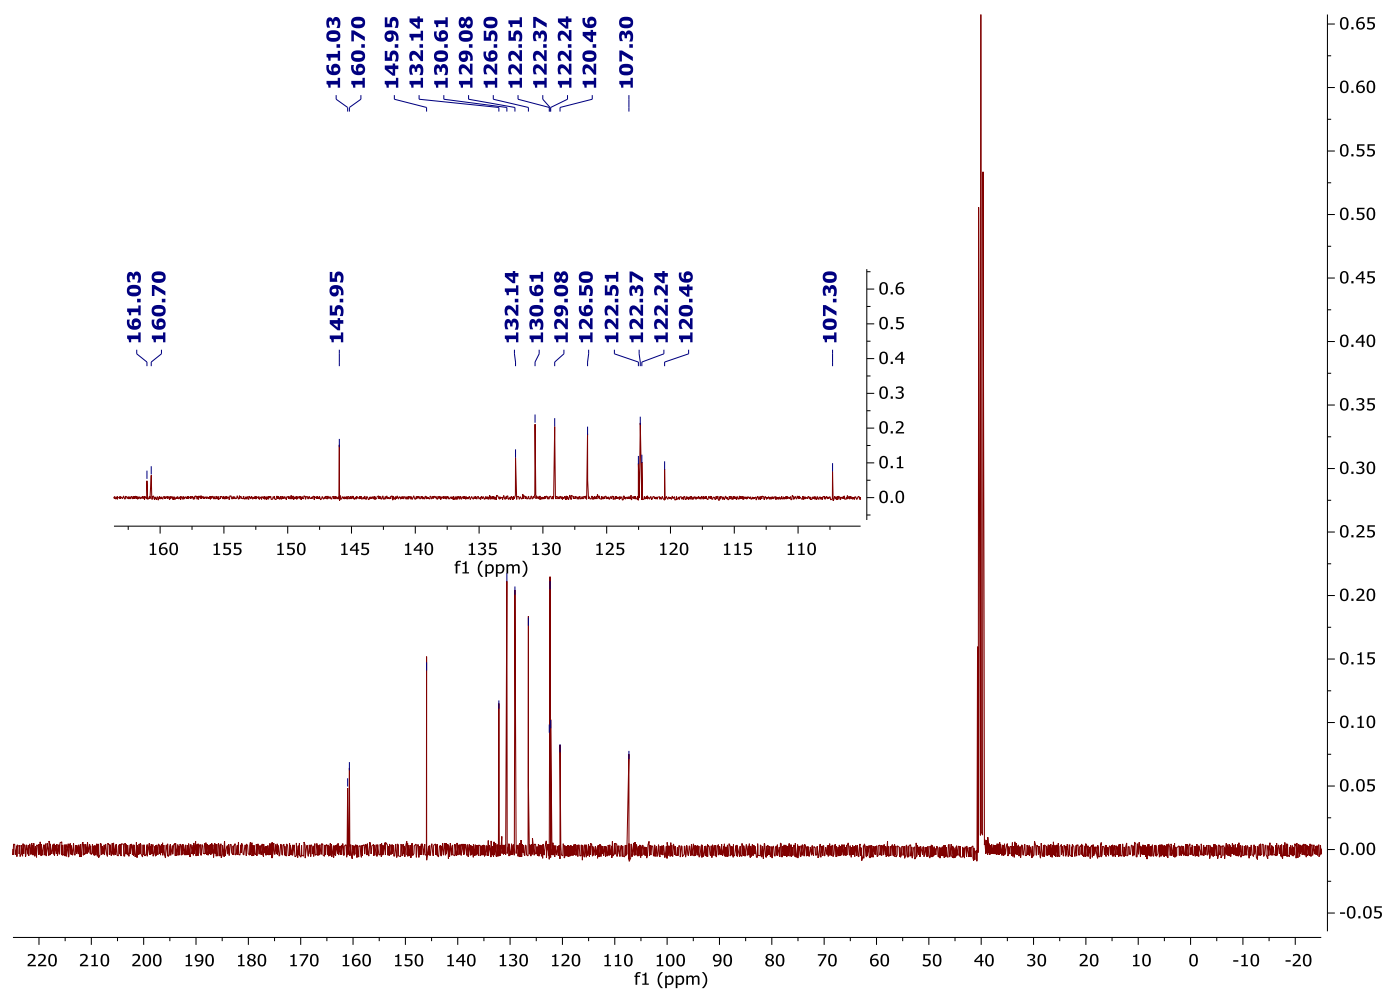

**Figure S11.**  $^{13}\text{C}$  NMR spectra of S-15 in  $\text{DMSO-}d_6$ .

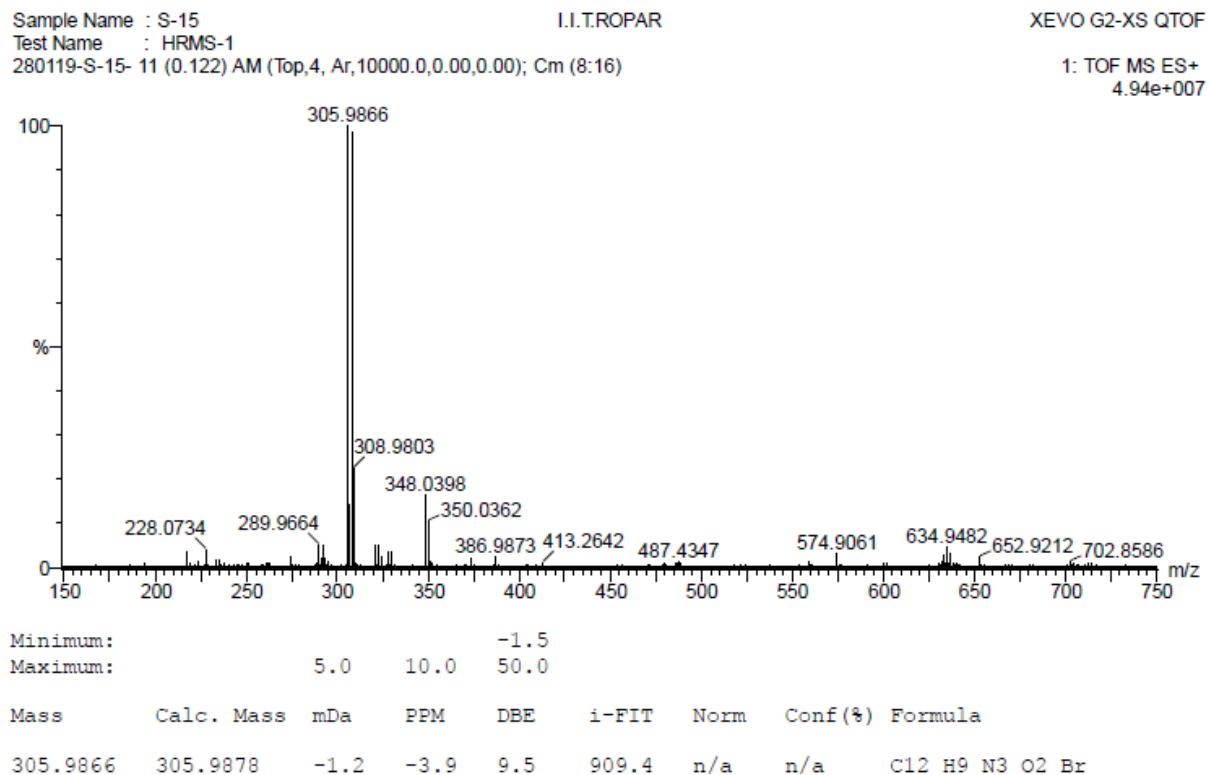

**Figure S12.** Mass spectra of S-15.

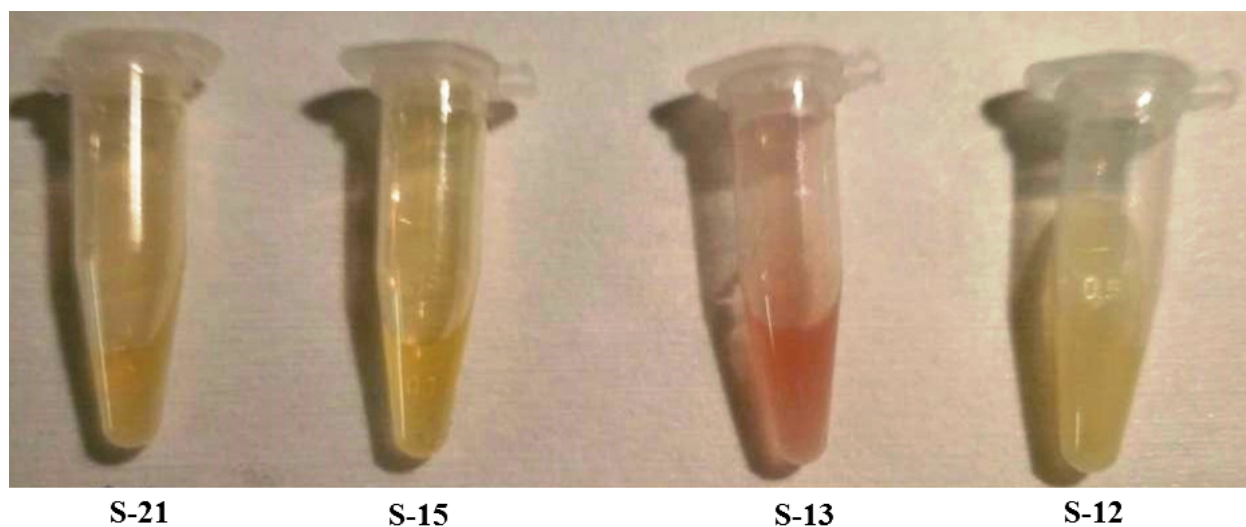

**Figure S13.** The picture shows the formation of precipitates and bleaching of solutions S-21, S-13 and S-12 except S-15 in DMSO/H<sub>2</sub>O (4:6, v/v).

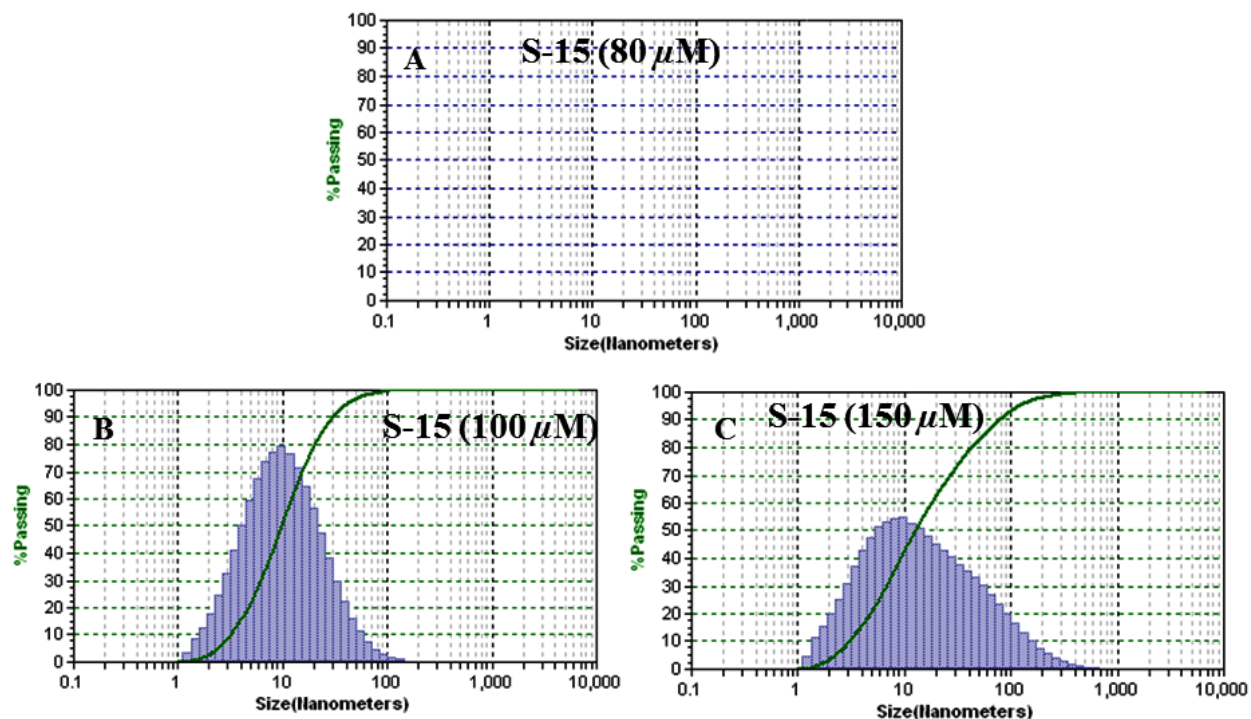

**Figure S14.** Dynamic light scattering (DLS) spectra of **S-15** prepared in DMSO/H<sub>2</sub>O (4:6, v/v) at different concentrations: (A) 80  $\mu\text{M}$ , (B) 100  $\mu\text{M}$  and (C) 150  $\mu\text{M}$ .

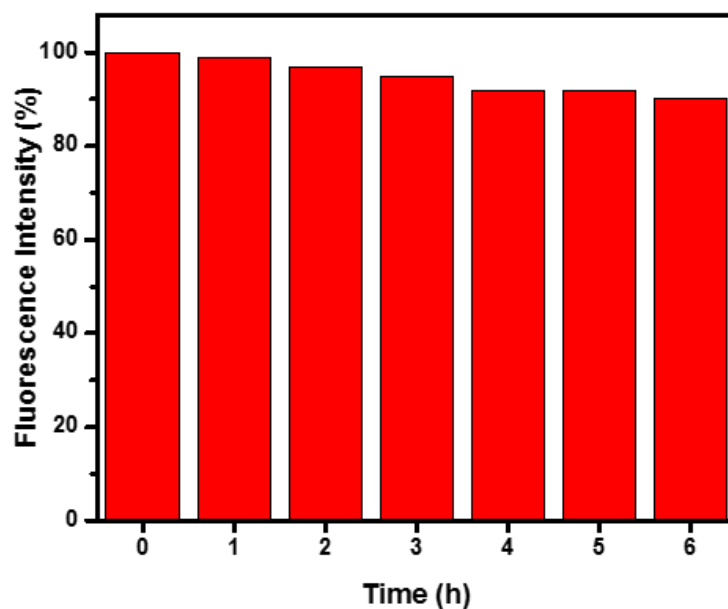

**Figure S15.** The change in emission intensity (at 552 nm) of **S-15** with time,  $\lambda_{\text{ex}} = 430 \text{ nm}$ ; Ex. and Em. slit width 10 nm.

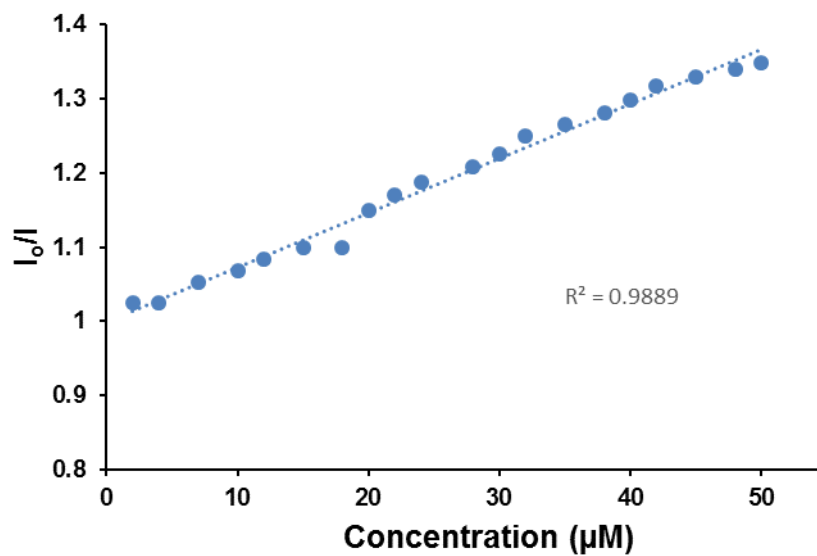

**Figure S16.** Stern-Volmer plot of **S-15** with increasing concentration of DNA,  $\lambda_{\text{ex}} = 430 \text{ nm}$ ; Ex. and Em. slit width 10 nm.

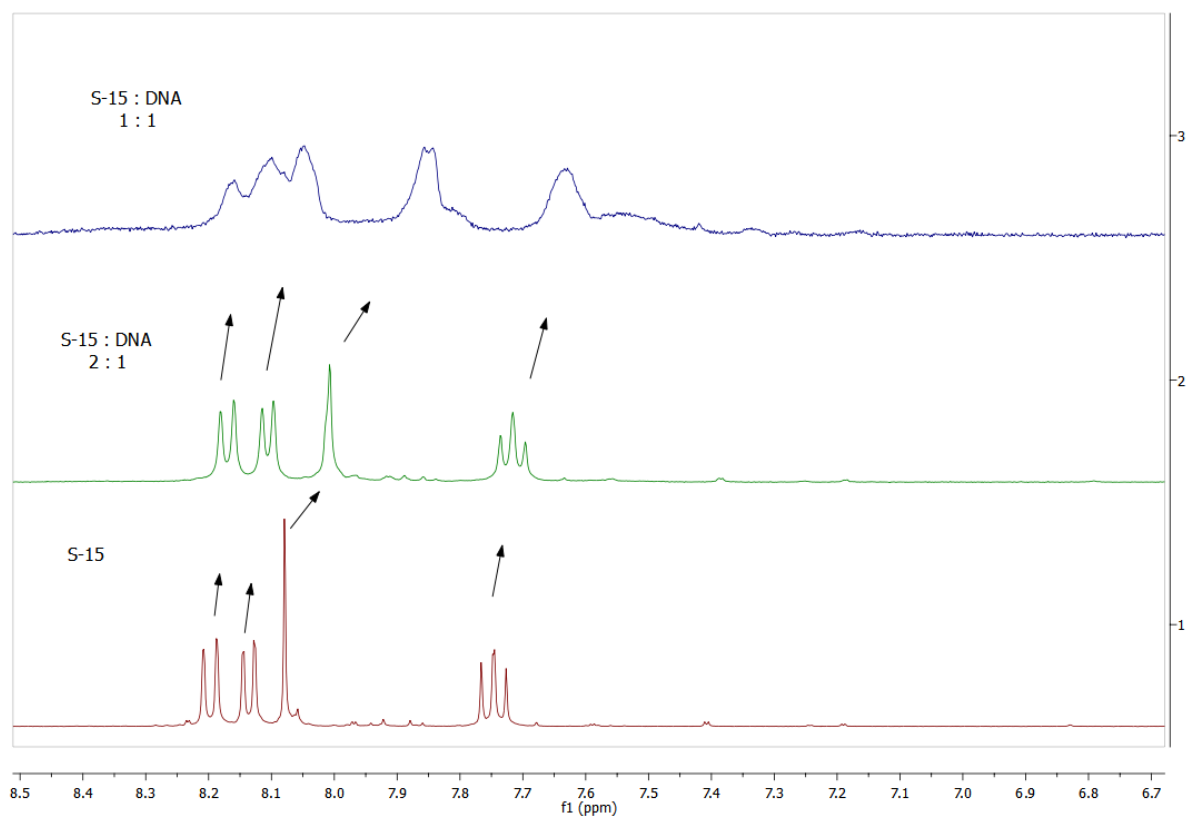

**Figure S17.** The partial  $^1\text{H}$  NMR spectra of **S-15** in the presence of different amount of DNA.

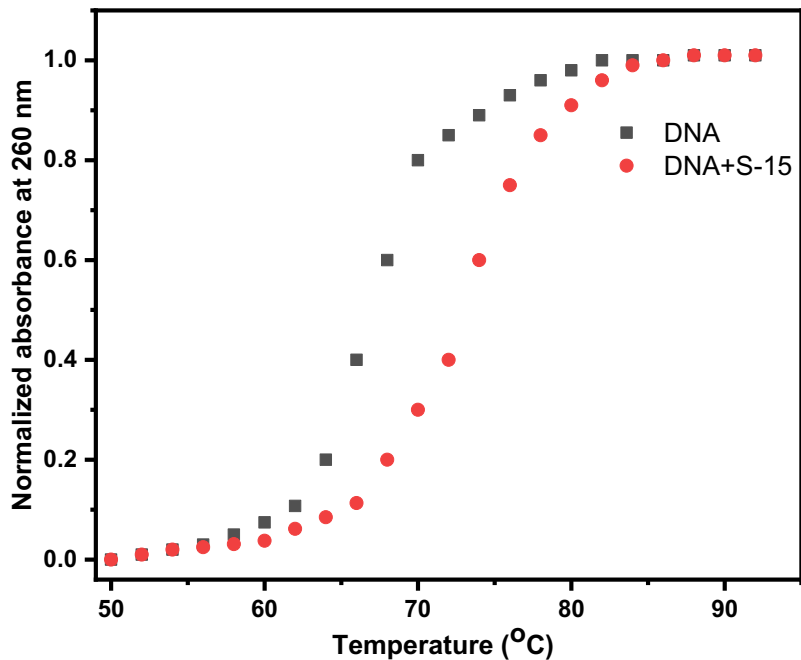

**Figure S18.** Temperature dependent the 260 nm absorbance of DNA both native and intercalated with S-15 (10  $\mu$ M).

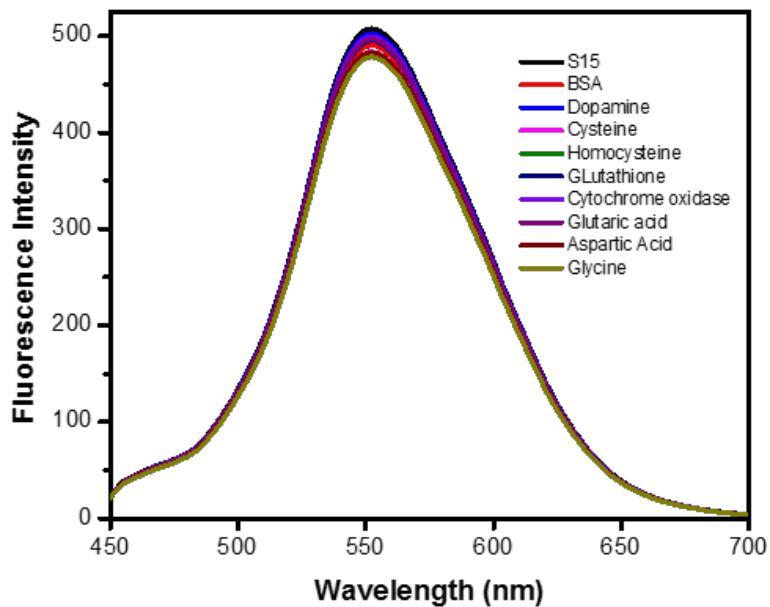

**Figure S19.** The change in the emission profile of S-15 in the presence of different amount of biological relevant analytes,  $\lambda_{\text{ex}} = 430$  nm; Ex. and Em. slit width 10 nm.



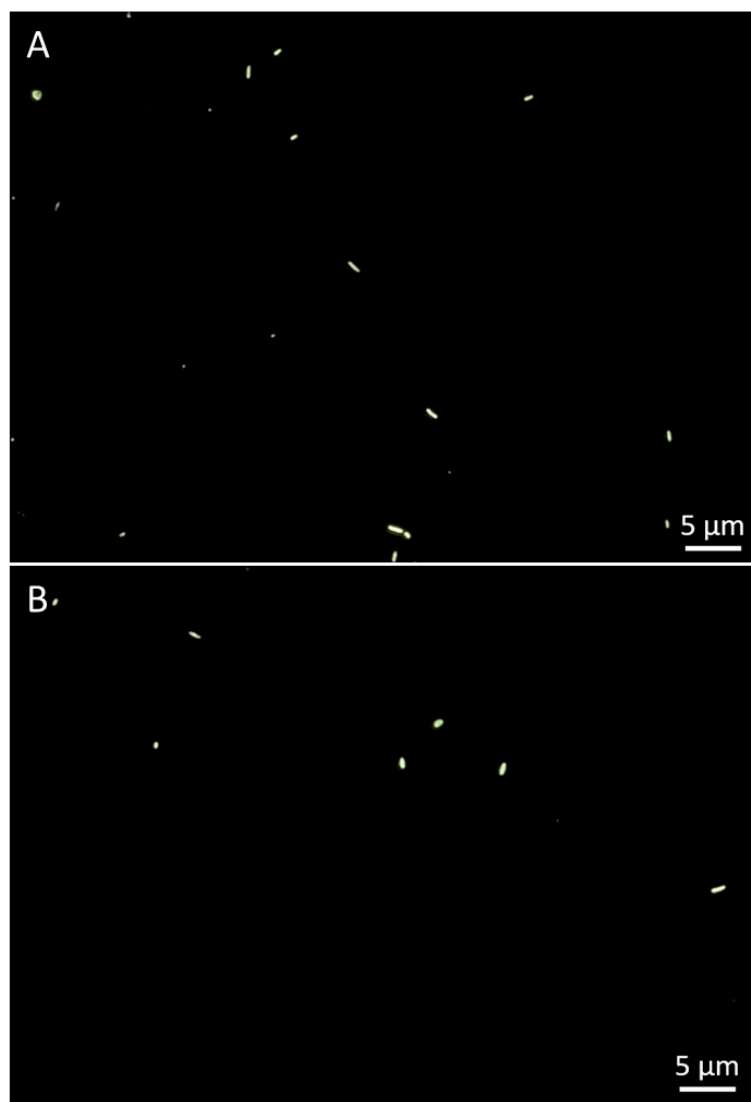

**Figure S20.** Optical image of *L. pneumophila* ( $10^5$  CFU/ml) incubated for 1 hour in (a) 1X phosphate buffer (PBS), and (b) DMSO/phosphate buffer (40:60, v/v). The images were recorded at 50 X magnification.

### Cytotoxicity of S-15

The cytotoxicity of **S-15** was investigated towards the HeLa cell line in MTT (MTT = (3-(4,5-dimethylthiazol-2-yl)-2,5-diphenyltetrazolium bromide) assay. The HeLa cells along with growth media were incubated at 37°C in 5% CO<sub>2</sub> in 96 well plate. The stock solution of **S-15** (100 μM)

was prepared in DMSO and different concentrations (10  $\mu$ M, 30  $\mu$ M, 50  $\mu$ M and 80  $\mu$ M) of **S-15** were added to well. To ensure the uniformity, solutions were thoroughly mixed. The plate was incubated for 24 h at 37°C in 5% CO<sub>2</sub>. The MTT solution concentrated at 5 mg/mL in PBS was prepared and 20  $\mu$ l of this solution was added into each well. After carefully mixing the content of wells, the plate was further incubated for 2 h. Further, medium was removed and formazan (MTT metabolic product) was suspended in 200  $\mu$ l DMSO. The solution was mixed properly and optical density was measured at 560 nm. Each experiment was performed in triplicate. The dose-dependent studies results showed that 90-97% cell remained viable up to 50  $\mu$ M concentration of **S-15** as shown in Figure S21.

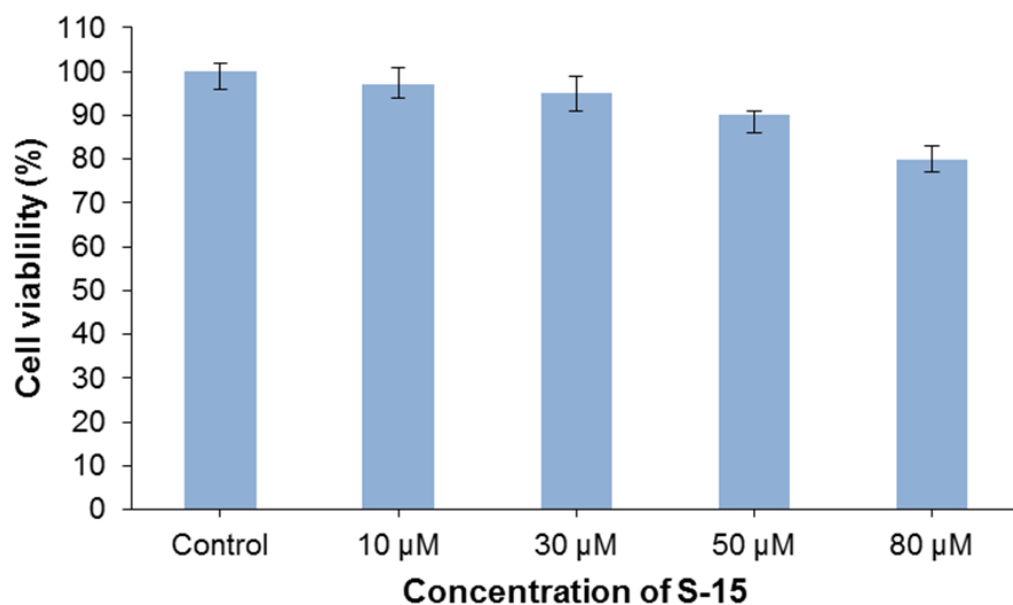

**Figure S21.** The dose-dependent MTT assay representing the percentage (%) of cell viability in different solutions of **S-15** diluted in DMSO.
